# Supplementary material for: Identification of the potentiating mutations and synergistic epistasis that enabled the evolution of inter-species cooperation
Source: PLoS One. 2017 May 11;12(5):e0174345. doi: 10.1371/journal.pone.0174345 (PMC5426591; doi:10.1371/journal.pone.0174345)
Supplement: S1 Table — (XLSX) [file pone.0174345.s001.xlsx]

## Sheet: Sheet1
Strain	metJ expression (mean)	metJ expression (SE)	metA expression (mean)	metA expression (SE)
R1	1.26141	0.161969	47.9835	8.16718
R2	0.607754	0.0541202	4.4542	0.519118
R3	1.03017	0.0132823	2.53163	0.830252
R1P1	2.43771	2.04962	28.8944	18.3628
R2P4	0.514712	0.0969944	0.846021	0.192705
R3P5	1.17901	0.0964495	1.03802	0.463472
R0P9	3.33703	0.252544	35.1799	9.01802
